# Supplementary material
Source: publisher figshare collection journal article supplement (https://karger.figshare.com/articles/dataset/_/6969593)
Supplement: Supplementary file 1 [file 1]

## The PHREG Procedure

## Model Information

|                    |                         |
|--------------------|-------------------------|
| Data Set           | WORK.IGAN_ANALYSIS_RANK |
| Dependent Variable | follow_up_period        |
| Censoring Variable | primary_outcome         |
| Censoring Value(s) | 0                       |
| Ties Handling      | BRESLOW                 |

|                             |      |
|-----------------------------|------|
| Number of Observations Read | 1596 |
| Number of Observations Used | 1596 |

## Class Level Information

| Class  | Value | Design Variables |
|--------|-------|------------------|
| gender | 0     | 0                |
|        | 1     | 1                |
| UA_Q4  | 0     | 0 0 0            |
|        | 1     | 1 0 0            |
|        | 2     | 0 1 0            |
|        | 3     | 0 0 1            |

## Summary of the Number of Event and Censored Values

| Total | Event | Censored | Percent Censored |
|-------|-------|----------|------------------|
| 1596  | 317   | 1279     | 80.14            |

## Convergence Status

Convergence criterion (GCONV=1E-8) satisfied.

## Model Fit Statistics

| Criterion | Without Covariates | With Covariates |
|-----------|--------------------|-----------------|
| -2 LOG L  | 4175.145           | 4125.228        |
| AIC       | 4175.145           | 4141.228        |
| SBC       | 4175.145           | 4171.300        |

## The PHREG Procedure

Testing Global Null Hypothesis: BETA=0

| Test             | Chi-Square | DF | Pr > ChiSq |
|------------------|------------|----|------------|
| Likelihood Ratio | 49.9162    | 8  | <.0001     |
| Score            | 52.9753    | 8  | <.0001     |
| Wald             | 51.6468    | 8  | <.0001     |

## Type 3 Tests

| Effect          | DF | Wald       |            |
|-----------------|----|------------|------------|
|                 |    | Chi-Square | Pr > ChiSq |
| UA_Q4           | 3  | 7.6939     | 0.0528     |
| gender          | 1  | 2.7634     | 0.0964     |
| age             | 1  | 0.3263     | 0.5679     |
| Proteinuria24h  | 1  | 0.3625     | 0.5471     |
| GFR_base_CKDEPI | 1  | 17.1770    | <.0001     |
| MBP             | 1  | 0.3518     | 0.5531     |

## Analysis of Maximum Likelihood Estimates

| Parameter       | DF | Parameter Estimate | Standard Error | Chi-Square | Pr > ChiSq | Hazard Ratio | 95% Hazard Ratio Confidence Limits |
|-----------------|----|--------------------|----------------|------------|------------|--------------|------------------------------------|
| UA_Q4           | 1  | 0.19991            | 0.18761        | 1.1354     | 0.2866     | 1.221        | 0.846 1.764                        |
| UA_Q4           | 2  | 0.30813            | 0.19499        | 2.4970     | 0.1141     | 1.361        | 0.929 1.994                        |
| UA_Q4           | 3  | 0.54927            | 0.20629        | 7.0897     | 0.0078     | 1.732        | 1.156 2.595                        |
| gender          | 1  | -0.21679           | 0.13041        | 2.7634     | 0.0964     | 0.805        | 0.624 1.040                        |
| age             | 1  | -0.00345           | 0.00605        | 0.3263     | 0.5679     | 0.997        | 0.985 1.008                        |
| Proteinuria24h  | 1  | 0.00439            | 0.00730        | 0.3625     | 0.5471     | 1.004        | 0.990 1.019                        |
| GFR_base_CKDEPI | 1  | -0.01024           | 0.00247        | 17.1770    | <.0001     | 0.990        | 0.985 0.995                        |
| MBP             | 1  | -0.00278           | 0.00468        | 0.3518     | 0.5531     | 0.997        | 0.988 1.006                        |

## Analysis of Maximum Likelihood Estimates

| Parameter       | Label                    |
|-----------------|--------------------------|
| UA_Q4           | 1 Rank for Variable UA 1 |
| UA_Q4           | 2 Rank for Variable UA 2 |
| UA_Q4           | 3 Rank for Variable UA 3 |
| gender          | 1 gender 1               |
| age             |                          |
| Proteinuria24h  |                          |
| GFR_base_CKDEPI |                          |
| MBP             |                          |
