# Supplementary material
Source: publisher figshare collection journal article supplement (https://karger.figshare.com/articles/dataset/_/6969593)
Supplement: Supplementary file 2 [file 1]

## The PHREG Procedure

## Model Information

|                    |                         |
|--------------------|-------------------------|
| Data Set           | WORK.IGAN_ANALYSIS_RANK |
| Dependent Variable | follow_up_period        |
| Censoring Variable | primary_outcome         |
| Censoring Value(s) | 0                       |
| Ties Handling      | BRESLOW                 |

|                             |      |
|-----------------------------|------|
| Number of Observations Read | 1596 |
| Number of Observations Used | 1482 |

## Class Level Information

| Class  | Value | Design Variables |   |   |
|--------|-------|------------------|---|---|
| gender | 0     | 0                |   |   |
|        | 1     | 1                |   |   |
| M      | 0     | 0                |   |   |
|        | 1     | 1                |   |   |
| E      | 0     | 0                |   |   |
|        | 1     | 1                |   |   |
| S      | 0     | 0                |   |   |
|        | 1     | 1                |   |   |
| T      | 0     | 0                | 0 |   |
|        | 1     | 1                | 0 |   |
|        | 2     | 0                | 1 |   |
| C      | 0     | 0                |   |   |
|        | 1     | 1                |   |   |
| UA_Q4  | 0     | 0                | 0 | 0 |
|        | 1     | 1                | 0 | 0 |
|        | 2     | 0                | 1 | 0 |
|        | 3     | 0                | 0 | 1 |

## Summary of the Number of Event and Censored Values

| Total | Event | Censored | Percent Censored |
|-------|-------|----------|------------------|
| 1482  | 283   | 1199     | 80.90            |

## The PHREG Procedure

## Convergence Status

Convergence criterion (GCONV=1E-8) satisfied.

## Model Fit Statistics

| Criterion | Without<br>Covariates | With<br>Covariates |
|-----------|-----------------------|--------------------|
| -2 LOG L  | 3674.676              | 3478.307           |
| AIC       | 3674.676              | 3506.307           |
| SBC       | 3674.676              | 3557.344           |

## Testing Global Null Hypothesis: BETA=0

| Test             | Chi-Square | DF | Pr > ChiSq |
|------------------|------------|----|------------|
| Likelihood Ratio | 196.3686   | 14 | <.0001     |
| Score            | 234.1529   | 14 | <.0001     |
| Wald             | 195.1787   | 14 | <.0001     |

## Type 3 Tests

| Effect          | DF | Wald<br>Chi-Square | Pr > ChiSq |
|-----------------|----|--------------------|------------|
| UA_Q4           | 3  | 12.4306            | 0.0060     |
| gender          | 1  | 3.7879             | 0.0516     |
| age             | 1  | 1.1103             | 0.2920     |
| Proteinuria24h  | 1  | 0.0408             | 0.8400     |
| GFR_base_CKDEPI | 1  | 6.3641             | 0.0116     |
| MBP             | 1  | 0.8994             | 0.3429     |
| M               | 1  | 84.3965            | <.0001     |
| E               | 1  | 4.0203             | 0.0450     |
| S               | 1  | 3.9478             | 0.0469     |
| T               | 2  | 8.5389             | 0.0140     |
| C               | 1  | 0.7538             | 0.3853     |

## The PHREG Procedure

## Analysis of Maximum Likelihood Estimates

| Parameter       | DF | Parameter Estimate | Standard Error | Chi-Square | Pr > ChiSq | Hazard Ratio | 95% Hazard Ratio Confidence Limits |
|-----------------|----|--------------------|----------------|------------|------------|--------------|------------------------------------|
| UA_Q4           | 1  | 0.35897            | 0.20201        | 3.1577     | 0.0756     | 1.432        | 0.964 2.127                        |
| UA_Q4           | 2  | 0.49712            | 0.20929        | 5.6419     | 0.0175     | 1.644        | 1.091 2.478                        |
| UA_Q4           | 3  | 0.79334            | 0.22693        | 12.2220    | 0.0005     | 2.211        | 1.417 3.449                        |
| gender          | 1  | -0.27486           | 0.14122        | 3.7879     | 0.0516     | 0.760        | 0.576 1.002                        |
| age             | 1  | -0.00715           | 0.00679        | 1.1103     | 0.2920     | 0.993        | 0.980 1.006                        |
| Proteinuria24h  | 1  | 0.00205            | 0.01017        | 0.0408     | 0.8400     | 1.002        | 0.982 1.022                        |
| GFR_base_CKDEPI | 1  | -0.00727           | 0.00288        | 6.3641     | 0.0116     | 0.993        | 0.987 0.998                        |
| MBP             | 1  | -0.00491           | 0.00518        | 0.8994     | 0.3429     | 0.995        | 0.985 1.005                        |
| M               | 1  | 1.39241            | 0.15157        | 84.3965    | <.0001     | 4.025        | 2.990 5.417                        |
| E               | 1  | 0.46099            | 0.22991        | 4.0203     | 0.0450     | 1.586        | 1.010 2.488                        |
| S               | 1  | 0.27627            | 0.13905        | 3.9478     | 0.0469     | 1.318        | 1.004 1.731                        |
| T               | 1  | 0.28550            | 0.15183        | 3.5360     | 0.0601     | 1.330        | 0.988 1.792                        |
| T               | 2  | 0.86239            | 0.31599        | 7.4484     | 0.0063     | 2.369        | 1.275 4.400                        |
| C               | 1  | -0.11673           | 0.13444        | 0.7538     | 0.3853     | 0.890        | 0.684 1.158                        |

## Analysis of Maximum Likelihood Estimates

| Parameter       | Label                    |
|-----------------|--------------------------|
| UA_Q4           | 1 Rank for Variable UA 1 |
| UA_Q4           | 2 Rank for Variable UA 2 |
| UA_Q4           | 3 Rank for Variable UA 3 |
| gender          | 1 gender 1               |
| age             |                          |
| Proteinuria24h  |                          |
| GFR_base_CKDEPI |                          |
| MBP             |                          |
| M               | 1 M 1                    |
| E               | 1 E 1                    |
| S               | 1 S 1                    |
| T               | 1 T 1                    |
| T               | 2 T 2                    |
| C               | 1 C 1                    |
