# Supplementary material
Source: publisher figshare collection journal article supplement (https://karger.figshare.com/articles/dataset/_/6969593)
Supplement: Supplementary file 3 [file 1]

## The PHREG Procedure

## Model Information

|                    |                         |
|--------------------|-------------------------|
| Data Set           | WORK.IGAN_ANALYSIS_RANK |
| Dependent Variable | follow_up_period        |
| Censoring Variable | primary_outcome         |
| Censoring Value(s) | 0                       |
| Ties Handling      | BRESLOW                 |

|                             |      |
|-----------------------------|------|
| Number of Observations Read | 1596 |
| Number of Observations Used | 1482 |

## Class Level Information

| Class    | Value | Design Variables |   |   |
|----------|-------|------------------|---|---|
| gender   | 0     | 0                |   |   |
|          | 1     | 1                |   |   |
| M        | 0     | 0                |   |   |
|          | 1     | 1                |   |   |
| E        | 0     | 0                |   |   |
|          | 1     | 1                |   |   |
| S        | 0     | 0                |   |   |
|          | 1     | 1                |   |   |
| T        | 0     | 0                | 0 |   |
|          | 1     | 1                | 0 |   |
|          | 2     | 0                | 1 |   |
| C        | 0     | 0                |   |   |
|          | 1     | 1                |   |   |
| ACEI_ARB | 0     | 0                |   |   |
|          | 1     | 1                |   |   |
| steroid  | 0     | 0                |   |   |
|          | 1     | 1                |   |   |
| UA_Q4    | 0     | 0                | 0 | 0 |
|          | 1     | 1                | 0 | 0 |
|          | 2     | 0                | 1 | 0 |
|          | 3     | 0                | 0 | 1 |

## The PHREG Procedure

## Summary of the Number of Event and Censored Values

| Total | Event | Censored | Percent Censored |
|-------|-------|----------|------------------|
| 1482  | 283   | 1199     | 80.90            |

## Convergence Status

Convergence criterion (GCONV=1E-8) satisfied.

## Model Fit Statistics

| Criterion | Without Covariates | With Covariates |
|-----------|--------------------|-----------------|
| -2 LOG L  | 3674.676           | 3463.191        |
| AIC       | 3674.676           | 3495.191        |
| SBC       | 3674.676           | 3553.518        |

## Testing Global Null Hypothesis: BETA=0

| Test             | Chi-Square | DF | Pr > ChiSq |
|------------------|------------|----|------------|
| Likelihood Ratio | 211.4846   | 16 | <.0001     |
| Score            | 249.3689   | 16 | <.0001     |
| Wald             | 209.4713   | 16 | <.0001     |

## Type 3 Tests

| Effect          | DF | Wald Chi-Square | Pr > ChiSq |
|-----------------|----|-----------------|------------|
| UA_Q4           | 3  | 14.5040         | 0.0023     |
| gender          | 1  | 3.5967          | 0.0579     |
| age             | 1  | 1.0083          | 0.3153     |
| Proteinuria24h  | 1  | 0.0498          | 0.8234     |
| GFR_base_CKDEPI | 1  | 6.8209          | 0.0090     |
| MBP             | 1  | 0.2655          | 0.6064     |
| M               | 1  | 74.0937         | <.0001     |
| E               | 1  | 4.2953          | 0.0382     |
| S               | 1  | 6.4055          | 0.0114     |
| T               | 2  | 7.2779          | 0.0263     |
| C               | 1  | 0.4534          | 0.5007     |
| ACEI_ARB        | 1  | 10.7073         | 0.0011     |
| steroid         | 1  | 6.0352          | 0.0140     |

## The PHREG Procedure

## Analysis of Maximum Likelihood Estimates

| Parameter       | DF | Parameter Estimate | Standard Error | Chi-Square | Pr > ChiSq | Hazard Ratio | 95% Hazard Ratio Confidence Limits |
|-----------------|----|--------------------|----------------|------------|------------|--------------|------------------------------------|
| UA_Q4           | 1  | 0.40642            | 0.20252        | 4.0273     | 0.0448     | 1.501        | 1.010 2.233                        |
| UA_Q4           | 2  | 0.52407            | 0.21016        | 6.2187     | 0.0126     | 1.689        | 1.119 2.550                        |
| UA_Q4           | 3  | 0.87149            | 0.23010        | 14.3447    | 0.0002     | 2.390        | 1.523 3.753                        |
| gender          | 1  | -0.26957           | 0.14214        | 3.5967     | 0.0579     | 0.764        | 0.578 1.009                        |
| age             | 1  | -0.00682           | 0.00679        | 1.0083     | 0.3153     | 0.993        | 0.980 1.007                        |
| Proteinuria24h  | 1  | 0.00214            | 0.00959        | 0.0498     | 0.8234     | 1.002        | 0.983 1.021                        |
| GFR_base_CKDEPI | 1  | -0.00746           | 0.00286        | 6.8209     | 0.0090     | 0.993        | 0.987 0.998                        |
| MBP             | 1  | -0.00267           | 0.00518        | 0.2655     | 0.6064     | 0.997        | 0.987 1.008                        |
| M               | 1  | 1.31361            | 0.15261        | 74.0937    | <.0001     | 3.720        | 2.758 5.016                        |
| E               | 1  | 0.47944            | 0.23133        | 4.2953     | 0.0382     | 1.615        | 1.026 2.542                        |
| S               | 1  | 0.35891            | 0.14181        | 6.4055     | 0.0114     | 1.432        | 1.084 1.891                        |
| T               | 1  | 0.32294            | 0.15354        | 4.4242     | 0.0354     | 1.381        | 1.022 1.866                        |
| T               | 2  | 0.73222            | 0.32158        | 5.1846     | 0.0228     | 2.080        | 1.107 3.906                        |
| C               | 1  | -0.09268           | 0.13765        | 0.4534     | 0.5007     | 0.911        | 0.696 1.194                        |
| ACEI_ARB        | 1  | -0.46187           | 0.14115        | 10.7073    | 0.0011     | 0.630        | 0.478 0.831                        |
| steroid         | 1  | -0.32942           | 0.13409        | 6.0352     | 0.0140     | 0.719        | 0.553 0.936                        |

## Analysis of Maximum Likelihood Estimates

| Parameter       | Label                    |
|-----------------|--------------------------|
| UA_Q4           | 1 Rank for Variable UA 1 |
| UA_Q4           | 2 Rank for Variable UA 2 |
| UA_Q4           | 3 Rank for Variable UA 3 |
| gender          | 1 gender 1               |
| age             |                          |
| Proteinuria24h  |                          |
| GFR_base_CKDEPI |                          |
| MBP             |                          |
| M               | 1 M 1                    |
| E               | 1 E 1                    |
| S               | 1 S 1                    |
| T               | 1 T 1                    |
| T               | 2 T 2                    |
| C               | 1 C 1                    |
| ACEI_ARB        | 1 ACEI_ARB 1             |
| steroid         | 1 steroid 1              |
